# Supplementary material for: A lipid–polymer hybrid nanoparticle (LPN)-loaded dissolving microneedle patch for promoting hair regrowth by transdermal miR-218 delivery
Source: Royal Society of Chemistry journal article supplement (doi:10.1039/d2bm01454h), 2022-11-07
Supplement: d2bm01454h1.pdf [file d2bm01454h1.pdf]

## Supporting information

### **A Lipid-polymer hybrid nanoparticle (LPN) loaded dissolving microneedle patch for promoting hair regrowth by transdermal miR-218 delivery**

*Yipu Zhao<sup>a</sup>, Ye Tian<sup>a</sup>, Weiliang Ye<sup>b</sup>, Xue Wang<sup>a</sup>, Ying Huai<sup>a</sup>, Qian Huang<sup>a</sup>, Xiaohua Chu<sup>a</sup>, Xudong Deng<sup>a, \*</sup>, Airong Qian<sup>a, \*</sup>*

- a. Lab for Bone Metabolism, Xi'an Key Laboratory of Special Medicine and Health Engineering; Key Lab for Space Biosciences and Biotechnology, School of Life Sciences, Northwestern Polytechnical University, Xi'an, Shaanxi, China; Research Center for Special Medicine and Health Systems Engineering, School of Life Sciences, Northwestern Polytechnical University, Xi'an, Shaanxi, China; NPU-UAB Joint Laboratory for Bone Metabolism, School of Life Sciences, Northwestern Polytechnical University, Xi'an, Shaanxi, 710072, China.
- b. Department of Pharmaceutics, School of Pharmacy, Fourth Military Medical University, Xi'an, China.

\* Corresponding Authors.

E-mails: dengxd@nwpu.edu.cn (X. Deng), qianair@nwpu.edu.cn (A. Qian).

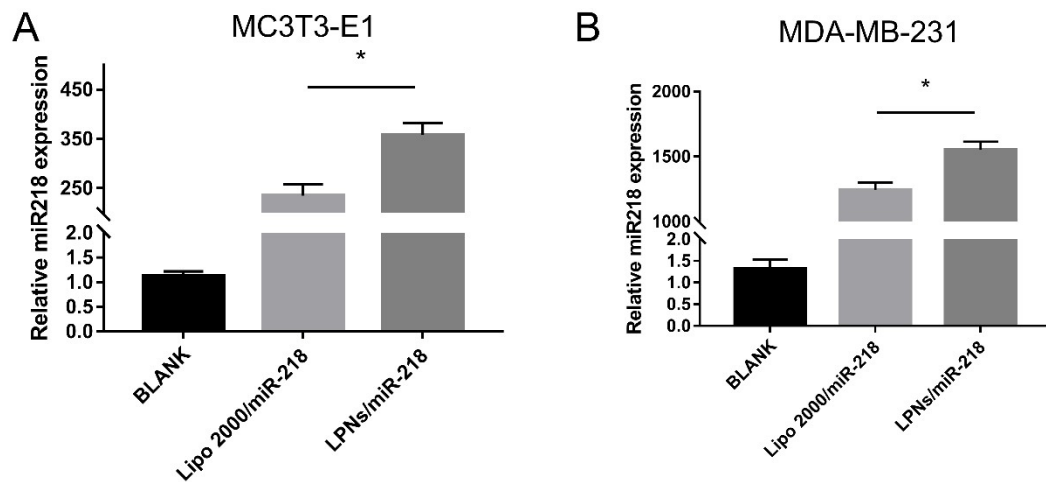

**Figure. S1.** The mature miR-218 expression level in MC3T3-E1 (A) and MDA-MB-231 (B) cells after transfection for 24 h, \* $P < 0.05$  vs Lipo2000/miR-218,  $n = 5$ . Data were shown as the mean  $\pm$  SD and the statistical significance was calculated by one-way ANOVA followed by Dunnett's test.

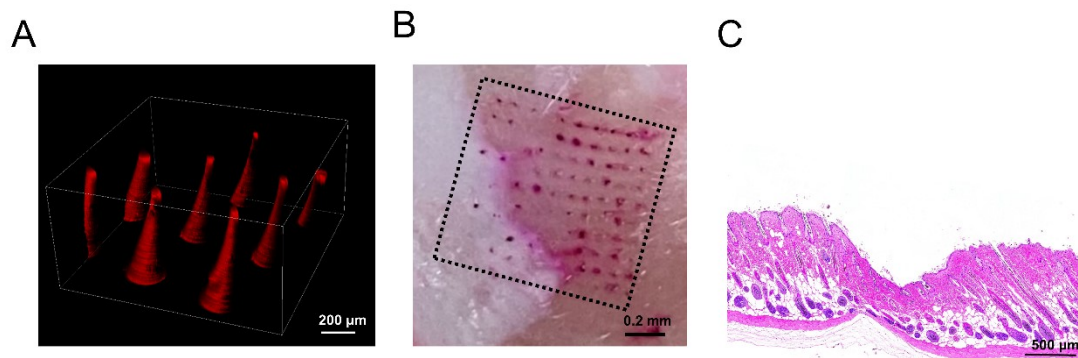

**Figure. S2.** (A) Confocal image of MN patch loaded with Rhodamine B in the tips (Scale bars=200  $\mu\text{m}$ ), and (B) *in vitro* skin insert test under MN loaded Rhodamine B after 15 min (Scale bars=0.2 mm). (C) H&E image of skin after MN implantation (Scale bars=500  $\mu\text{m}$ )

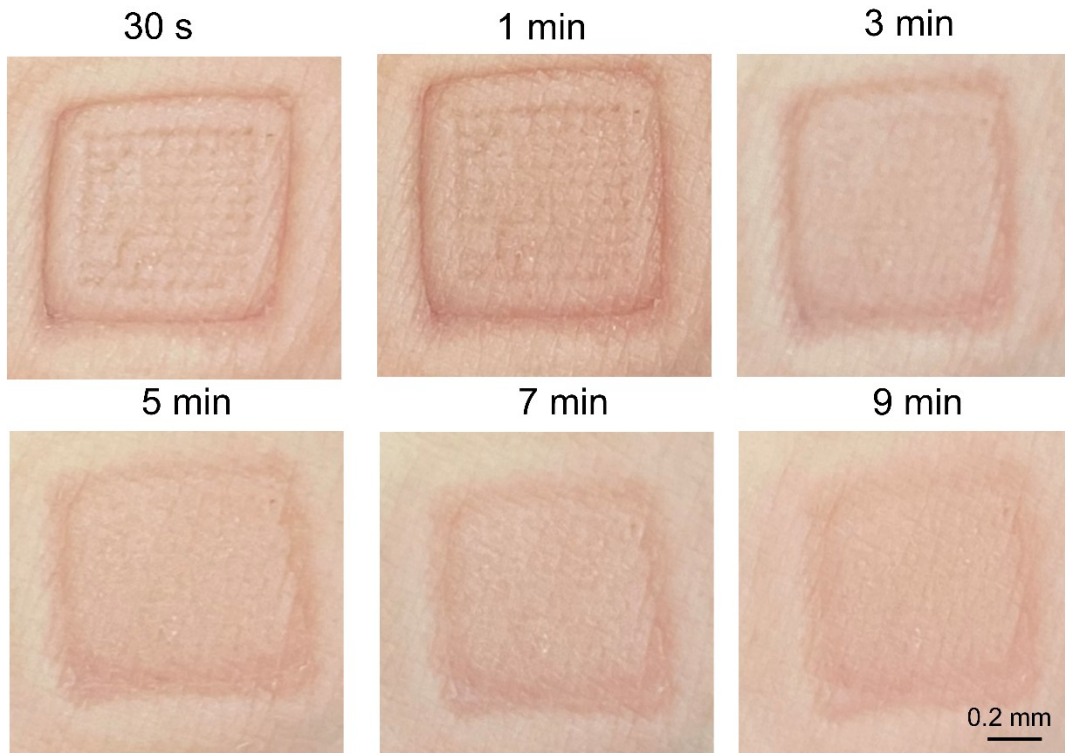

**Figure. S3.** The mice skin recovery images after 30 s constant pressure of MN (Scale bar = 0.2 mm).

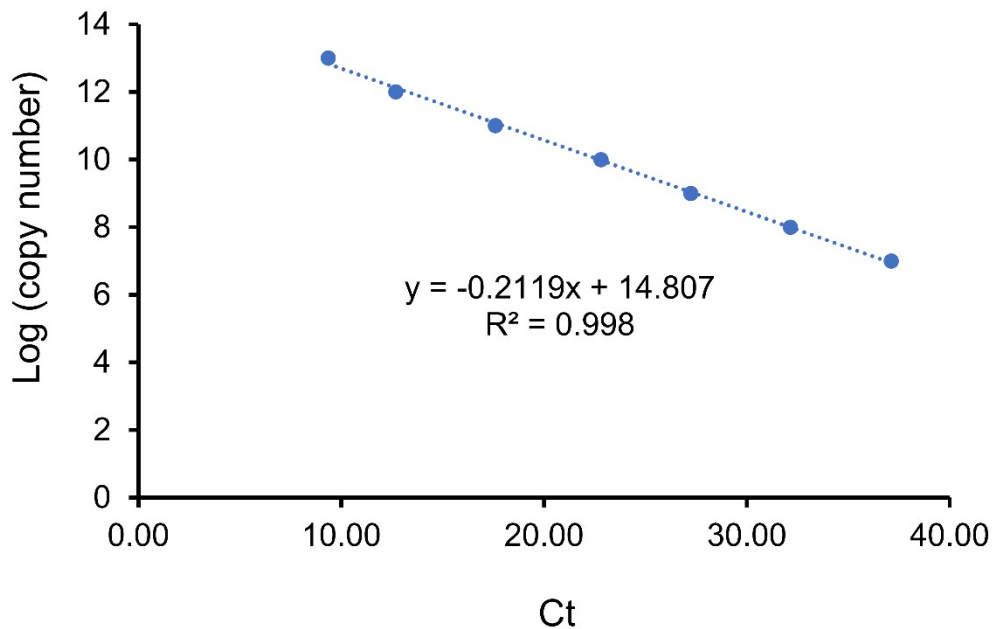

**Figure. S4.** The miR-218 standard curve of copy number and Ct value over the range of 0.069-690000 ng/mL by qRT-PCR.
